# Supplementary material for: Morphology-based noninvasive early prediction of serial-passage potency enhances the selection of clone-derived high-potency cell bank from mesenchymal stem cells
Source: PubMed Central journal article supplement (PMC9526913; doi:10.1186/s41232-022-00214-w), 2022-10-02
Supplement: 41232_2022_214_MOESM2_ESM.pdf [file 41232_2022_214_MOESM2_ESM.pdf]

Supplementary Table 1. Basic morphological parameters measured per single cells.

| Number | Parameter type    | Name                |                                                                                                                        |
|--------|-------------------|---------------------|------------------------------------------------------------------------------------------------------------------------|
| 1      | Shape descriptors | Area                | Total pixels in the recognized cell region.                                                                            |
| 2      |                   | Compactness         | $(\text{Perimeter})^2/\text{Area}$                                                                                     |
| 3      |                   | Inner radius        | Radius of inscribed circle from the centroid of cell area.                                                             |
| 4      |                   | Length width ratio  | Length/Width                                                                                                           |
| 5      |                   | Perimeter           | The arc length of recognized cell region.                                                                              |
| 6      |                   | Shape factor        | $4\pi(\text{Area})/(\text{Perimeter})^2$                                                                               |
| 7      |                   | Texture descriptors | Correlation                                                                                                            |
| 8      | Energy            |                     | Gray-Level Co-occurrence Matrix (GLCM) of cell region.<br>GLCM = M<br>Energy = $\sum_{i,j} M_{i,j}^2$                  |
| 9      | Entropy           |                     | Gray-Level Co-occurrence Matrix (GLCM) of cell region.<br>GLCM = M<br>Entropy<br>$= - \sum_{i,j} M_{i,j} \log M_{i,j}$ |
| 10     |                   | Inertia             | Gray-Level Co-occurrence Matrix (GLCM) of cell region.                                                                 |

|    |              |                                                                                                                                            |
|----|--------------|--------------------------------------------------------------------------------------------------------------------------------------------|
|    |              | $\text{GLCM} = M$ $\text{Inertia} = \sum_{i,j} (i - j)^2 M_{ij}$                                                                           |
| 11 | Homogony     | <p>Gray-Level Co-occurrence Matrix (GLCM) of cell region.</p> $\text{GLCM} = M$ <p>Homogony</p> $= \sum_{i,j} \frac{M_{i,j}}{1 +  i - j }$ |
| 12 | Intensity SD | <p>Standard deviation of intensities of pixels in cell region.</p>                                                                         |
