# Supplementary material for: Morphology-based noninvasive early prediction of serial-passage potency enhances the selection of clone-derived high-potency cell bank from mesenchymal stem cells
Source: PubMed Central journal article supplement (PMC9526913; doi:10.1186/s41232-022-00214-w), 2022-10-02
Supplement: 41232_2022_214_MOESM3_ESM.pdf [file 41232_2022_214_MOESM3_ESM.pdf]

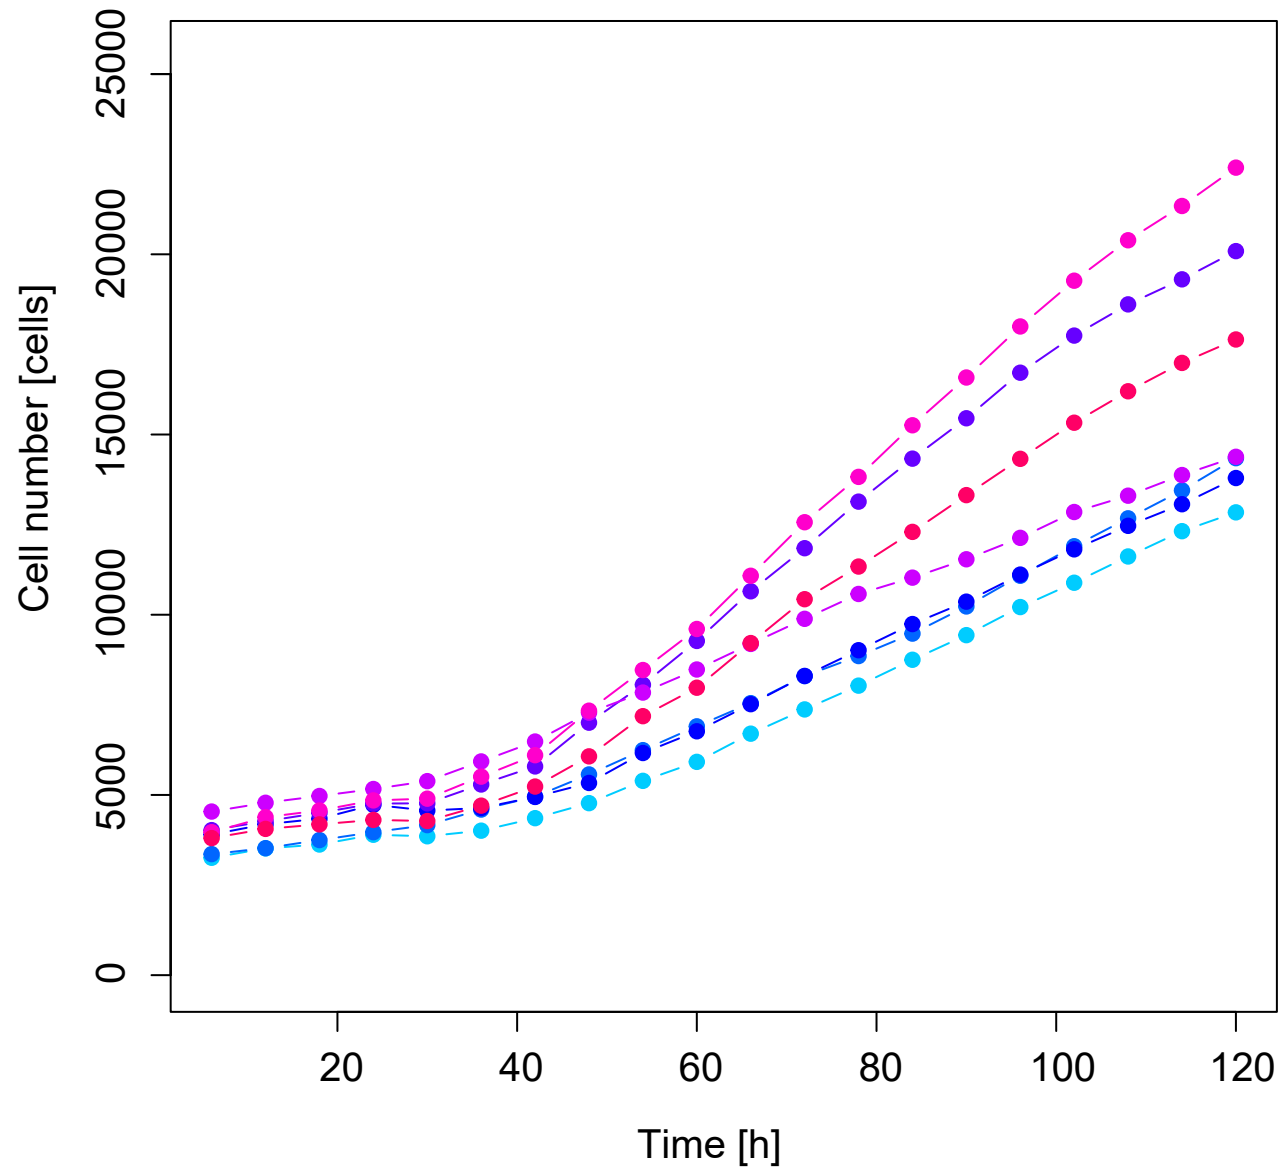

Supplementary Fig. 2 Growth profile of bulk MSCs.
