# Supplementary material for: Morphology-based noninvasive early prediction of serial-passage potency enhances the selection of clone-derived high-potency cell bank from mesenchymal stem cells
Source: PubMed Central journal article supplement (PMC9526913; doi:10.1186/s41232-022-00214-w), 2022-10-02
Supplement: 41232_2022_214_MOESM4_ESM.pdf [file 41232_2022_214_MOESM4_ESM.pdf]

Supplementary Table 2. Morphological descriptors highly contributing to PCA.

| PC1                   |                 | PC2                         |                 |
|-----------------------|-----------------|-----------------------------|-----------------|
| Parameters            | Factor loadings | Parameters                  | Factor loadings |
| 84h_mean_energy       | 0.08            | 24h_mean_length_width_ratio | 0.11            |
| 78h_mean_energy       | 0.08            | 30h_mean_length_width_ratio | 0.10            |
| 72h_mean_energy       | 0.08            | 18h_mean_perimeter          | -0.10           |
| 54h_mean_length       | -0.08           | 12h_mean_length             | -0.10           |
| 60h_mean_perimeter    | -0.08           | 18h_sd_width                | -0.10           |
| 78h_mean_intensity_sd | -0.08           | 24h_sd_perimeter            | -0.10           |
| 60h_mean_length       | -0.08           | 24h_sd_length               | -0.10           |
| 54h_mean_area         | -0.08           | 18h_sd_compactness          | -0.11           |
| 72h_mean_intensity_sd | -0.08           | 18h_mean_length             | -0.11           |
| 54h_mean_perimeter    | -0.08           | 24h_mean_length             | -0.11           |
